# Supplementary material for: Co3O4/NiO@GQD@SO3H nanocomposite as a superior catalyst for the synthesis of chromenpyrimidines
Source: Royal Society of Chemistry journal article supplement (doi:10.1039/c9ra05896f), 2019-01-01

## Supplementary information

### **Co<sub>3</sub>O<sub>4</sub>/NiO@GQDs@SO<sub>3</sub>H nanocomposite as a superior catalyst for the synthesis of chromenpyrimidines**

**Javad Safaei-Ghomi\*, Zahra Omidshafiei**

*Department of Organic Chemistry, Faculty of Chemistry, University of Kashan, Kashan, P.O. Box 87317-51167, I. R. Iran Corresponding author. E-mail addresses: safaei@kashanu.ac.ir, Fax: +98-31-55912397; Tel.: +98-31-55912385*

**General procedure for the preparation of chromenpyrimidines:**

A mixture of aldehyde (1 mmol), 6-amino-1,3-dimethyluracil (1 mmol), 4-hydroxy coumarine (1 mmol) and 5 mg  $\text{Co}_3\text{O}_4/\text{NiO}@G\text{QDs}@SO_3\text{H}$  nanocomposite were stirred in 5 mL ethanol under reflux condition. The reaction was monitored by TLC. After completion of the reaction, the solution was filtered and the heterogeneous catalyst was recovered. Water was added, and the precipitate was collected by filtration and washed with water. The crude product was recrystallized or washed with ethanol to give the pure product.

The conversion is described as ratios of how much of a reactant has reacted.

$$\text{Conversion efficiency} = \frac{\textit{The amount of Limiting reagent consumed}}{\textit{The amount of Limiting reagent in}} \times 100$$

**FT-IR: 6-Amino-5-((4-hydroxy-2-oxo-2H-chromen-3-yl) (phenyl) methyl)-1,3-dimethylpyrimidine-2,4(1H,3H)-dione (4a):**

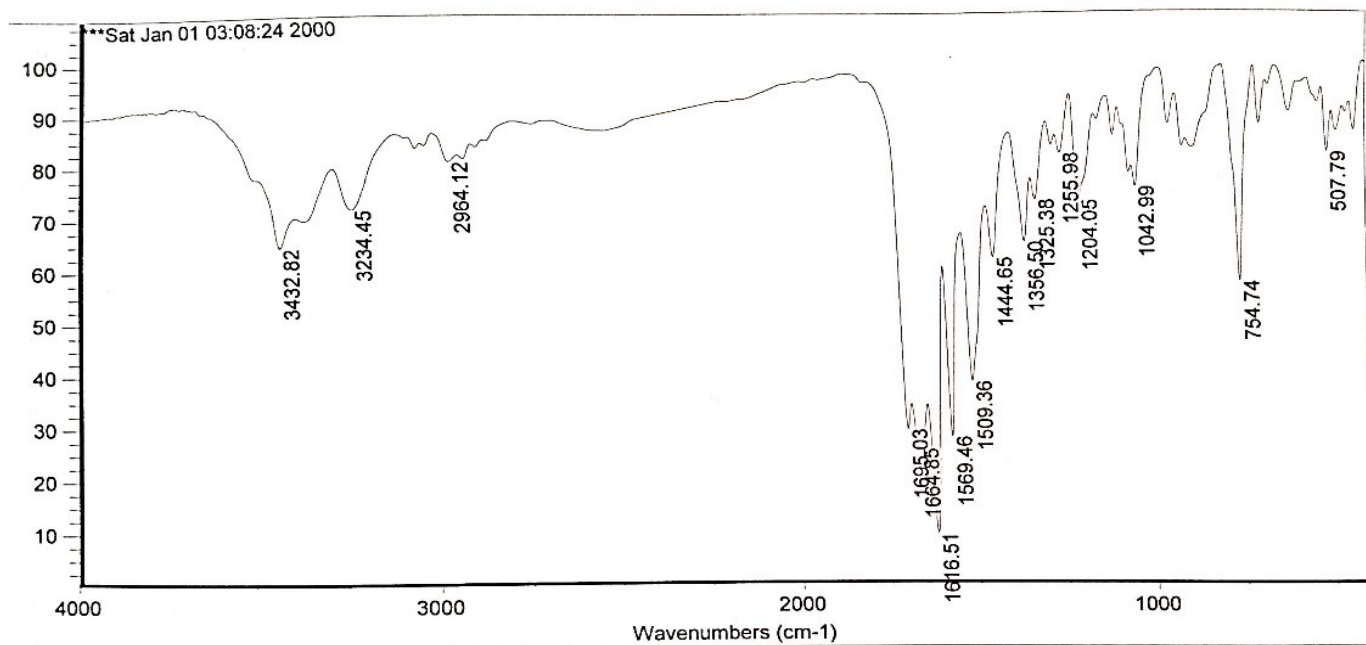



FT-IR: 6-Amino-5-((4-hydroxy-2-oxo-2H-chromen-3-yl) (4-chlorophenyl) methyl)-1,3-dimethylpyrimidine-2,4(1H,3H)-dione (4b):

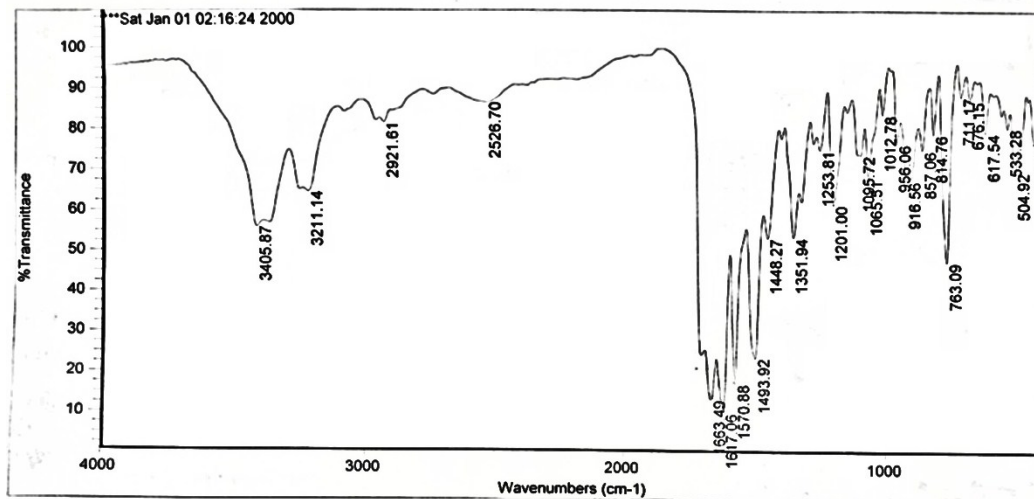



FT-IR: 6-Amino-5-((4-hydroxy-2-oxo-2H-chromen-3-yl) (4-methoxyphenyl) methyl)-1,3-dimethylpyrimidine-2,4(1H,3H)-dione (4c):

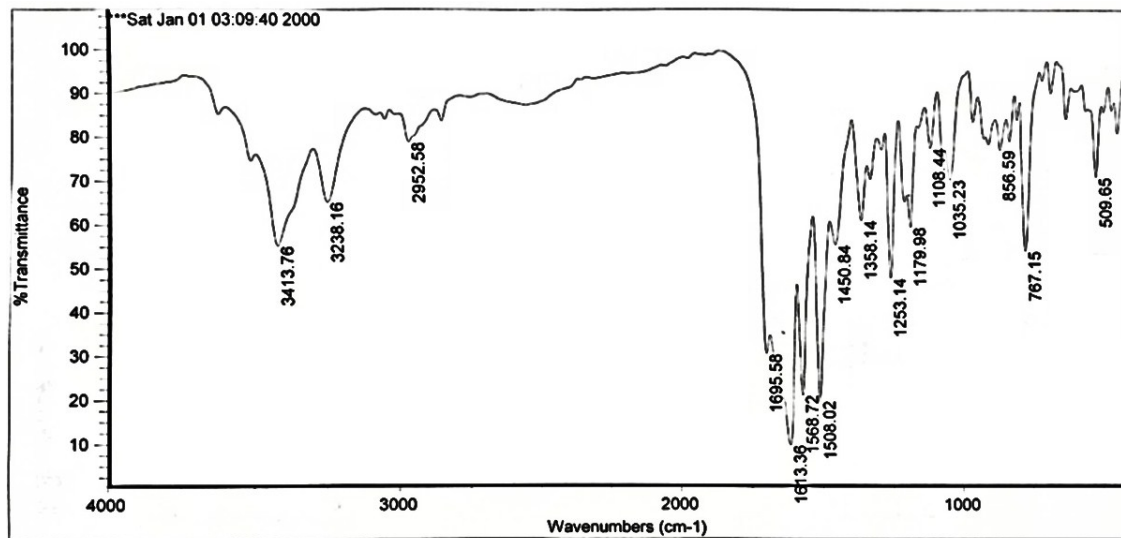





FT-IR: 6-Amino-5-((4-hydroxy-2-oxo-2H-chromen-3-yl) (4-nitrophenyl) methyl)-1,3-dimethylpyrimidine-2,4(1H,3H)-dione (4d):

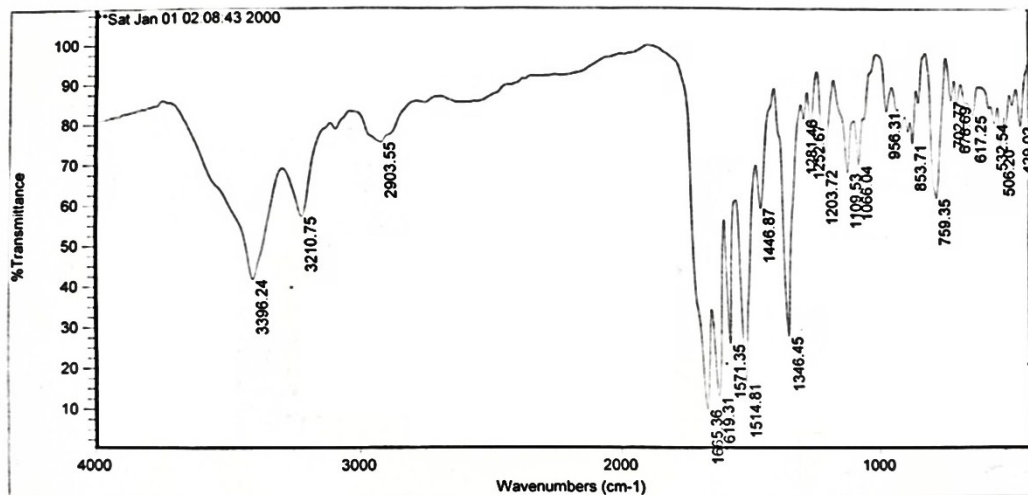

**<sup>1</sup>H NMR: 6-Amino-5-((4-hydroxy-2-oxo-2H-chromen-3-yl) (4-nitrophenyl) methyl)-1,3-dimethylpyrimidine-2,4(1H,3H)-dione (4d):**

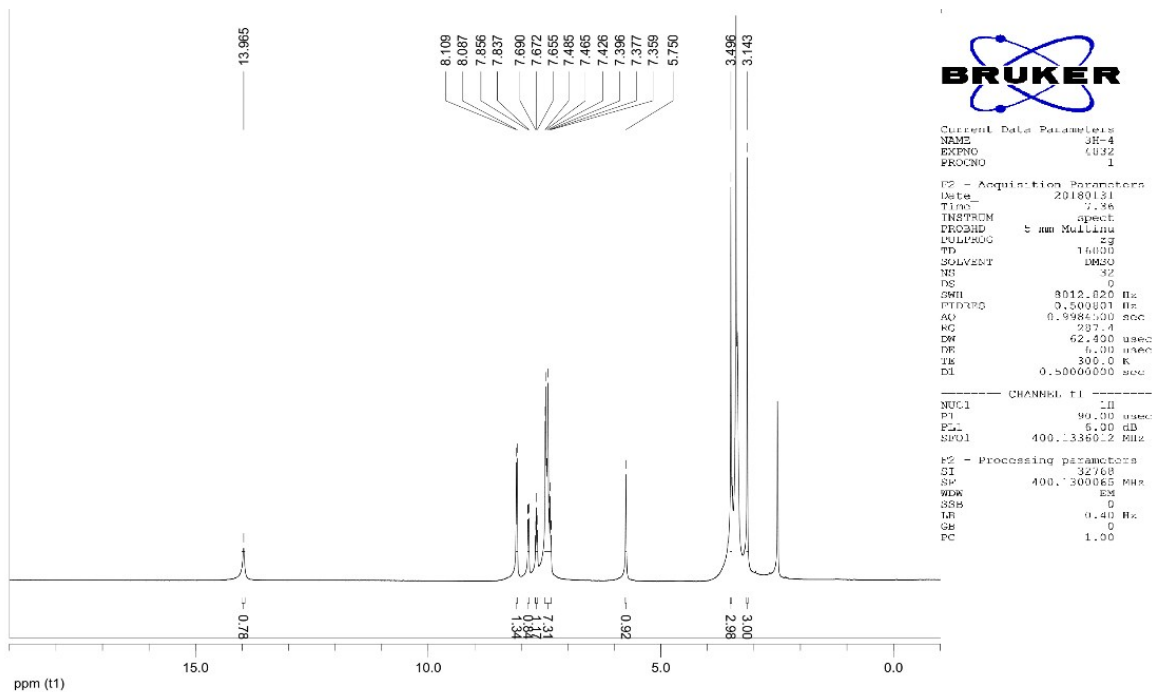

**<sup>13</sup>C NMR: 6-Amino-5-((4-hydroxy-2-oxo-2H-chromen-3-yl) (4-nitrophenyl) methyl)-1,3-dimethylpyrimidine-2,4(1H,3H)-dione (4d):**

Zahra-omidshafiei-Z6

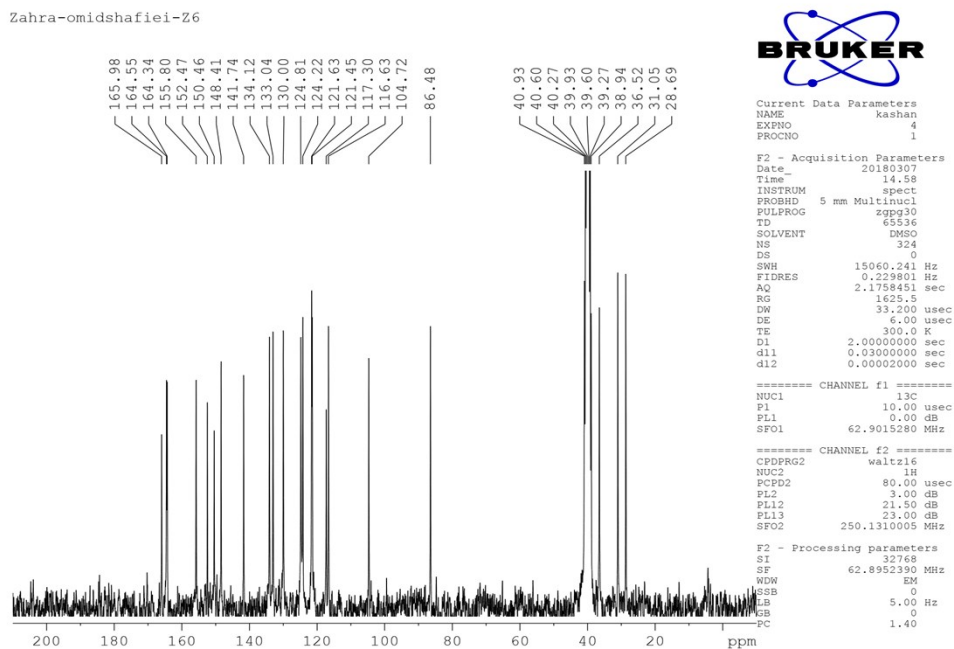

FT-IR: 6-Amino-5-((4-hydroxy-2-oxo-2H-chromen-3-yl) (3-nitrophenyl) methyl)-1,3-dimethylpyrimidine-2,4(1H,3H)-dione (4e):

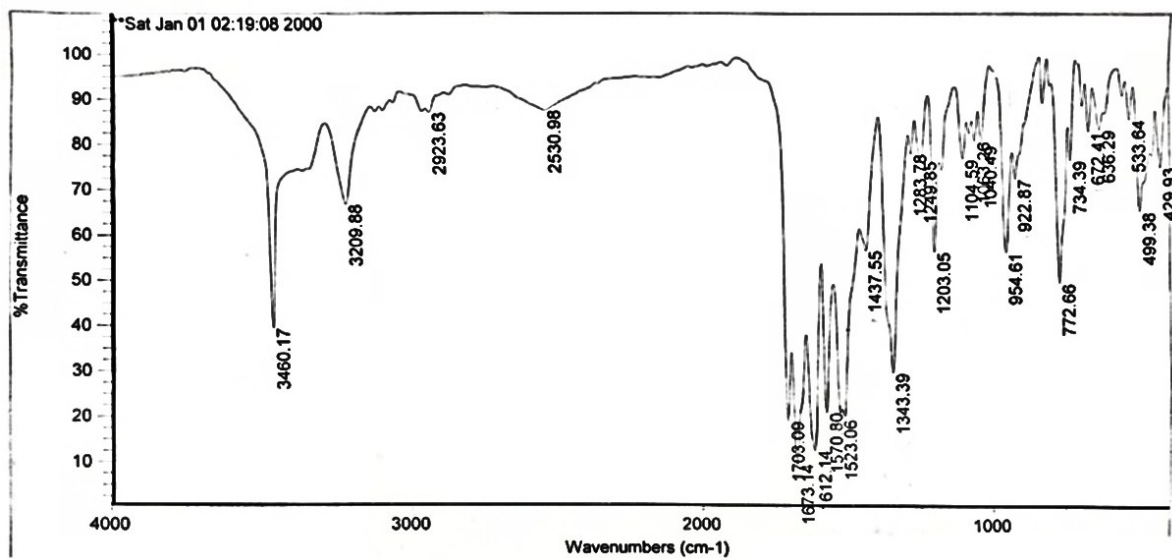

**<sup>1</sup>H NMR: 6-Amino-5-((4-hydroxy-2-oxo-2H-chromen-3-yl) (3-nitrophenyl) methyl)-1,3-dimethylpyrimidine-2,4(1H,3H)-dione (4e):**

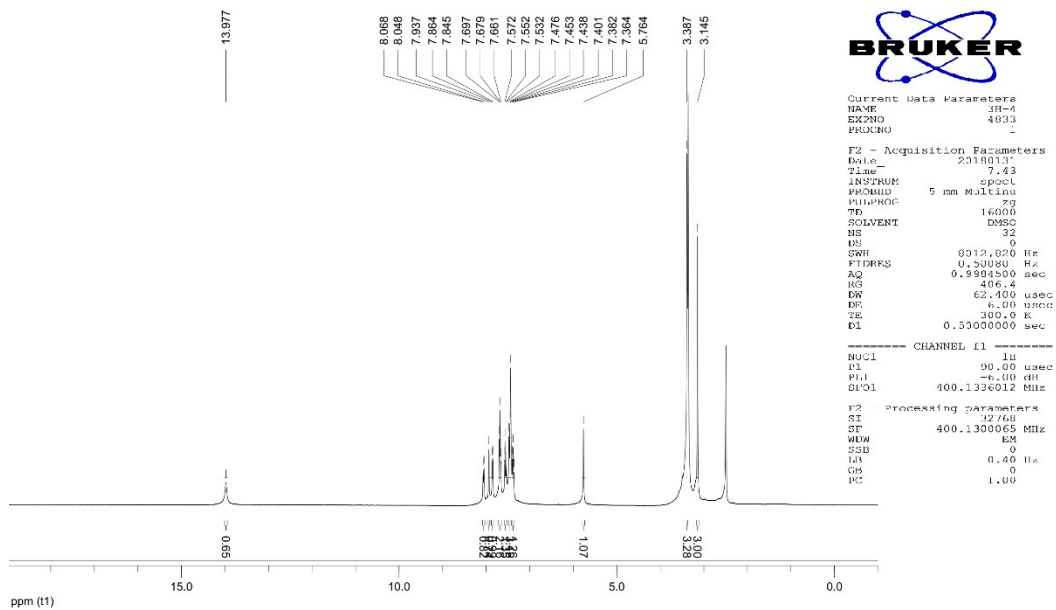

**FT-IR: 6-Amino-5-((4-hydroxy-2-oxo-2H-chromen-3-yl) (4-hydroxyphenyl) methyl)-1,3-dimethylpyrimidine-2,4(1H,3H)-dione (4f):**

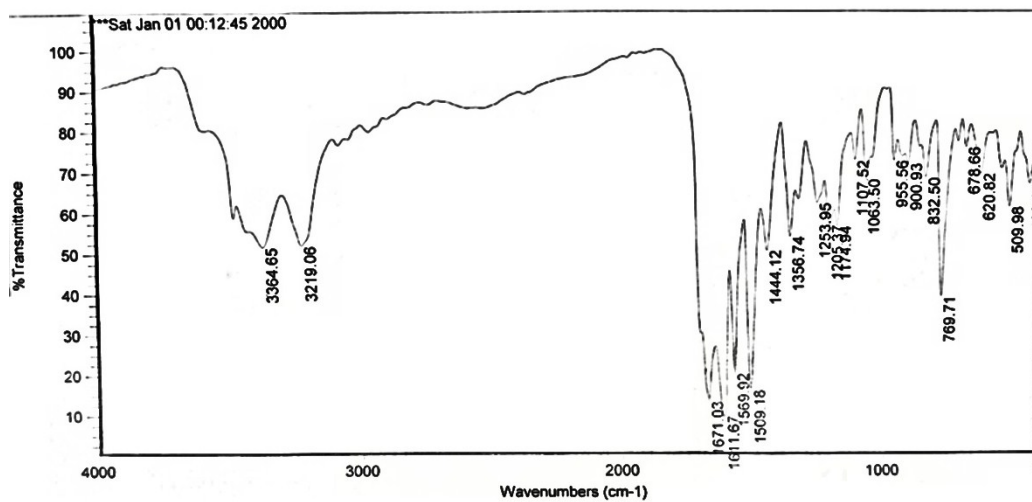

**<sup>1</sup>H NMR: 6-Amino-5-((4-hydroxy-2-oxo-2H-chromen-3-yl) (4-hydroxyphenyl) methyl)-1,3-dimethylpyrimidine-2,4(1H,3H)-dione (4f):**

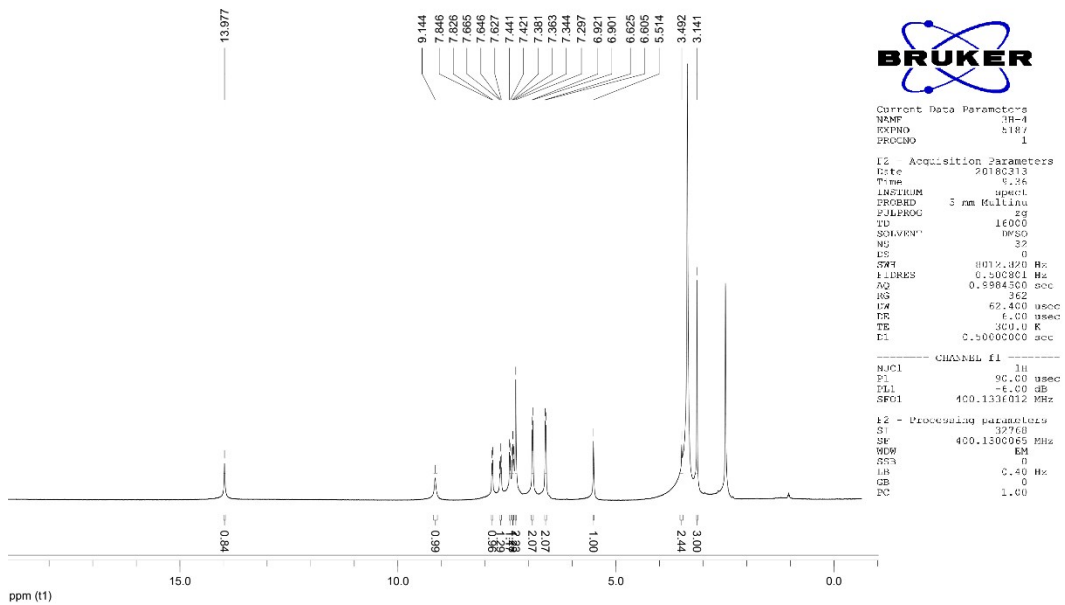

**<sup>13</sup>C NMR: 6-Amino-5-((4-hydroxy-2-oxo-2H-chromen-3-yl) (4-hydroxyphenyl) methyl)-1,3-dimethylpyrimidine-2,4(1H,3H)-dione (4f):**

Zahra-Omidshafie-Z9

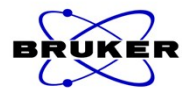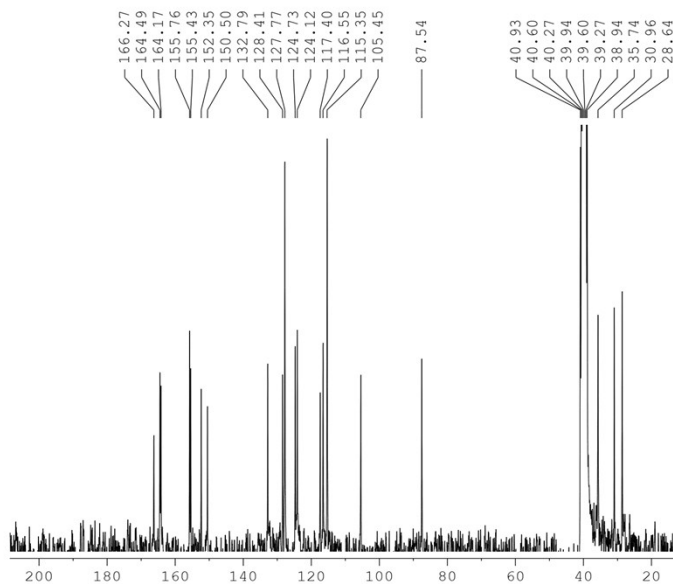

```

Current Data Parameters
NAME          kashan
EXPNO         6
PROCNO        1

F2 - Acquisition Parameters
Date_         20180307
Time          16.41
INSTRUM       spect
PROBHD        5 mm Multinucl
PULPROG       zgpg30
TD            65536
SOLVENT       DMSO
NS            517
DS            0
SWH           15060.241 Hz
FIDRES        0.229801 Hz
AQ            2.1758451 sec
RG            1625.5
DM            33.200 usec
DE            6.00 usec
TE            300.0 K
D1            2.0000000 sec
d11           0.0300000 sec
d12           0.0002000 sec

===== CHANNEL f1 =====
NUC1          13C
P1            10.00 usec
PL1           0.00 dB
SFO1         62.9015280 MHz

===== CHANNEL f2 =====
CPDPRG2       waltz16
NUC2          1H
PCPD2         80.00 usec
PL2           3.00 dB
PL12          21.50 dB
PL13          23.00 dB
SFO2         250.1310005 MHz

F2 - Processing parameters
SI            32768
SF            62.8952390 MHz
WDW           EM
SSB           0
LB            5.00 Hz
GB            0
PC            1.40
    
```



**FT-IR: 6-Amino-5-((4-hydroxy-2-oxo-2H-chromen-3-yl) (3-hydroxyphenyl) methyl)-1,3-dimethylpyrimidine-2,4(1H,3H)-dione (4g):**

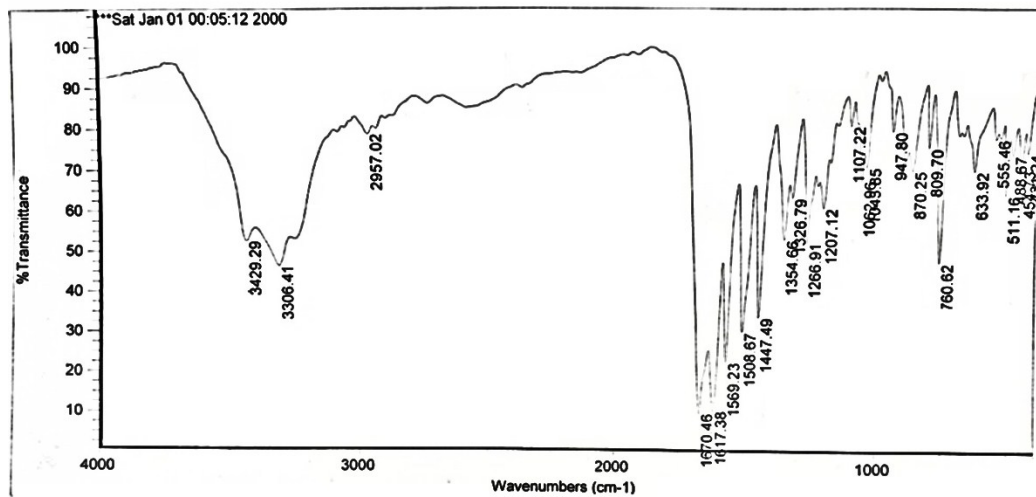

**<sup>1</sup>H NMR: 6-Amino-5-((4-hydroxy-2-oxo-2H-chromen-3-yl) (3-hydroxyphenyl) methyl)-1,3-dimethylpyrimidine-2,4(1H,3H)-dione (4g):**

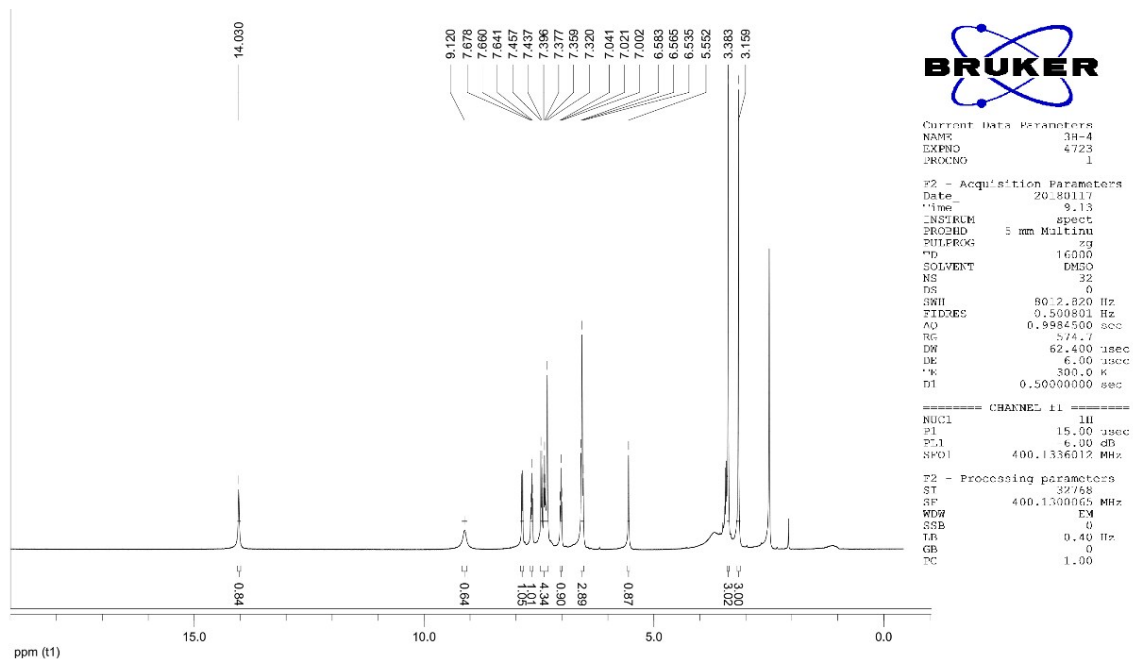

**FT-IR: 6-Amino-5-((4-hydroxy-2-oxo-2H-chromen-3-yl) (2-hydroxyphenyl) methyl)-1,3-dimethylpyrimidine-2,4(1H,3H)-dione (4h):**

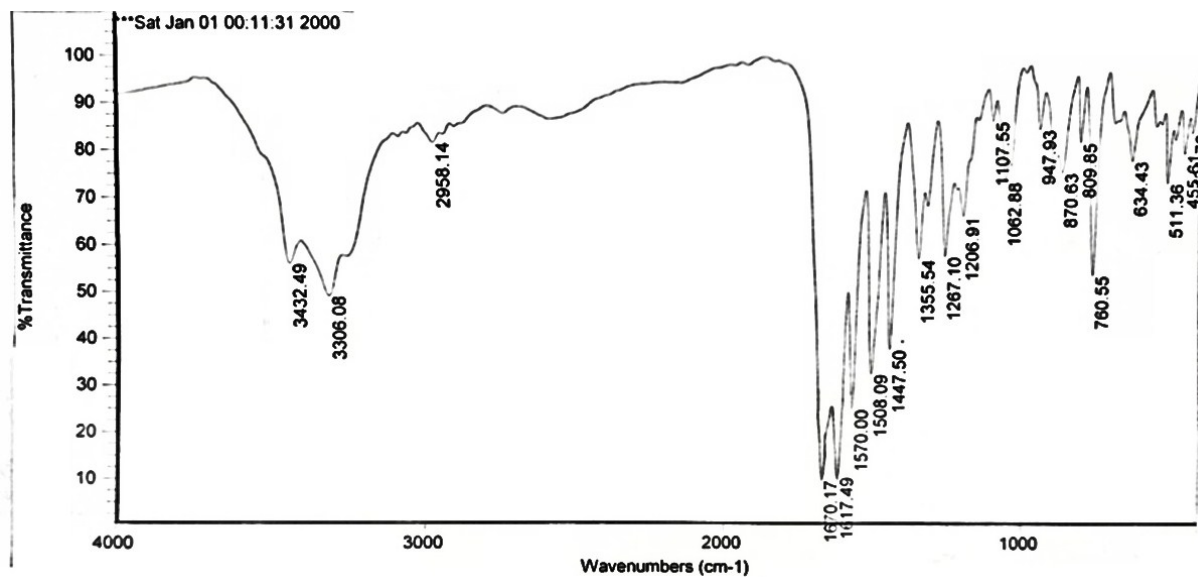



**C NMR: 6-Amino-5-((4-hydroxy-2-oxo-2H-chromen-3-yl) (2-hydroxyphenyl) methyl)-1,3-dimethylpyrimidine-2,4(1H,3H)-dione (4h):**

Zahra-Omisshafiei--28

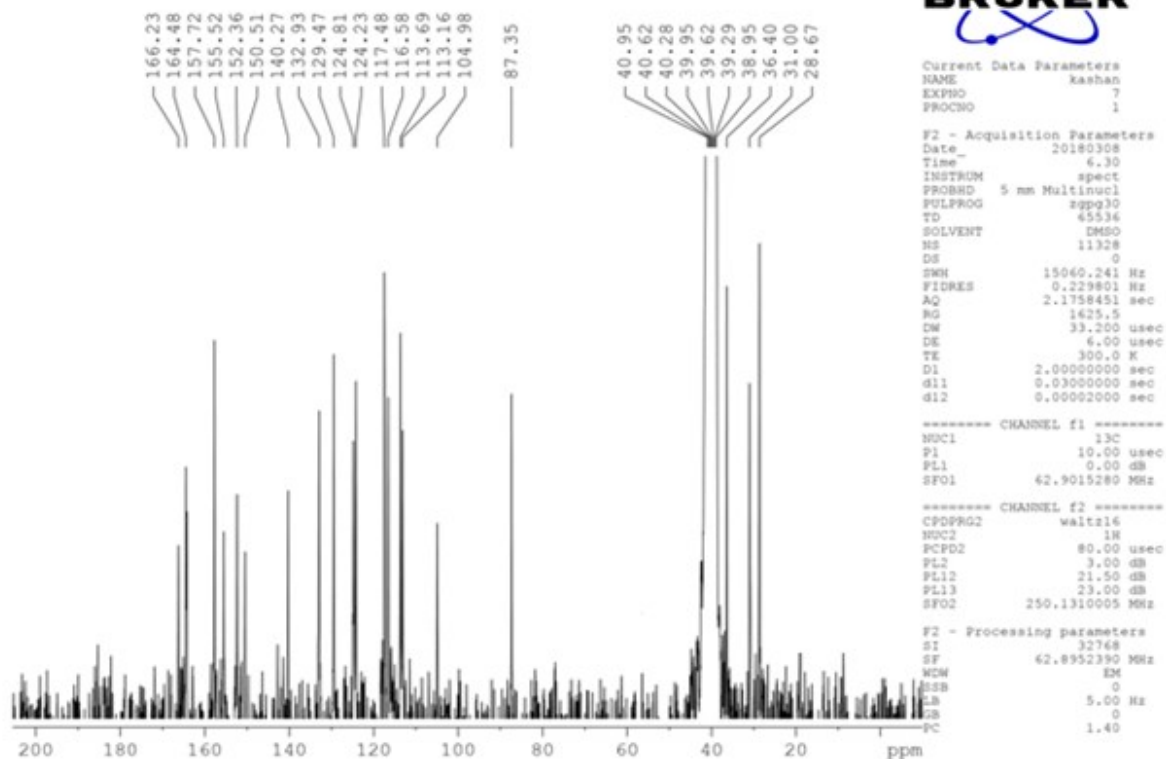

**FT-IR: 6-Amino-5-((4-hydroxy-2-oxo-2H-chromen-3-yl) (4-methylphenyl) methyl)-1,3-dimethylpyrimidine-2,4(1H,3H)-dione (4i):**

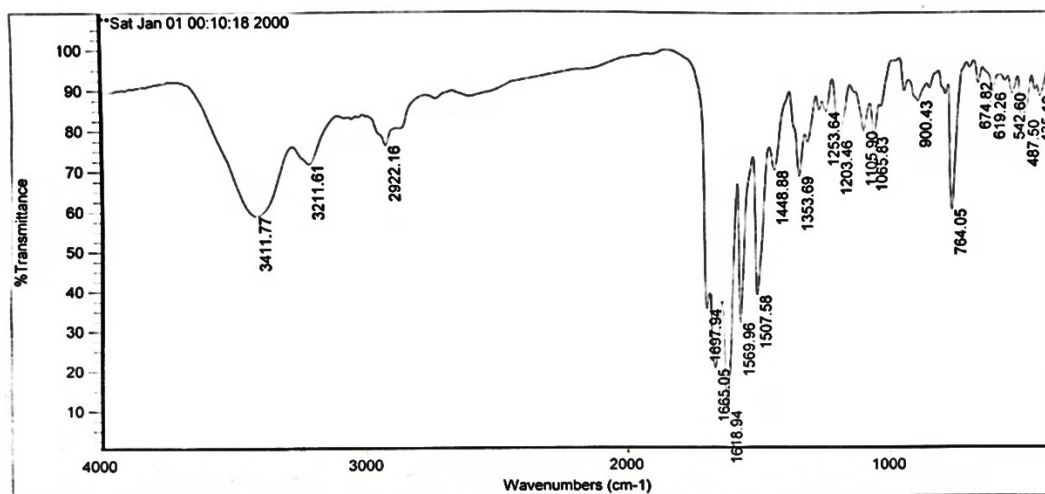



**FT-IR: 6-Amino-5-((4-hydroxy-2-oxo-2H-chromen-3-yl) (3-methylphenyl) methyl)-1,3-dimethylpyrimidine-2,4(1H,3H)-dione (4j):**

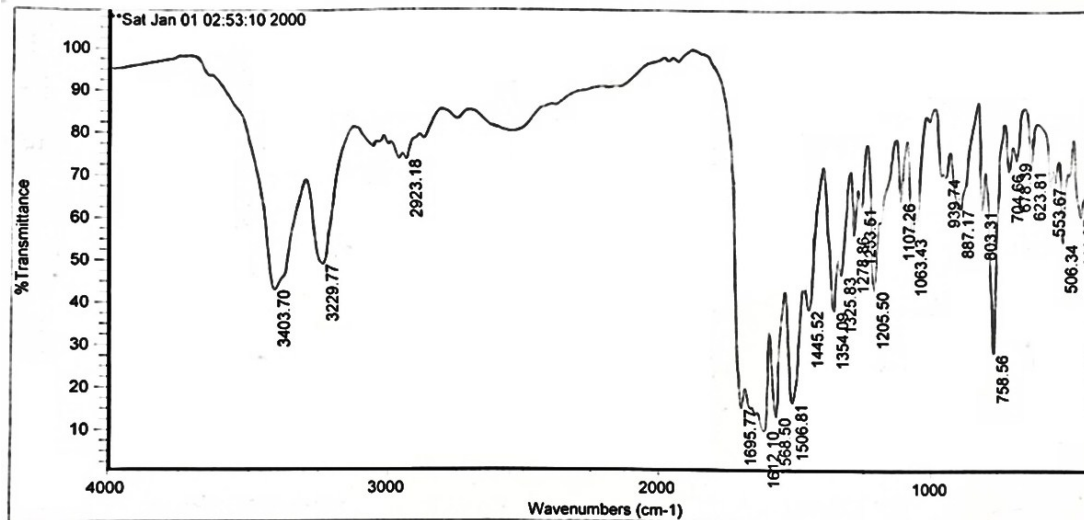





**C NMR: 6-Amino-5-((4-hydroxy-2-oxo-2H-chromen-3-yl) (3-methylphenyl) methyl)-1,3-dimethylpyrimidine-2,4(1H,3H)-dione (4j):**

Zahra-OmidShafie-Z10

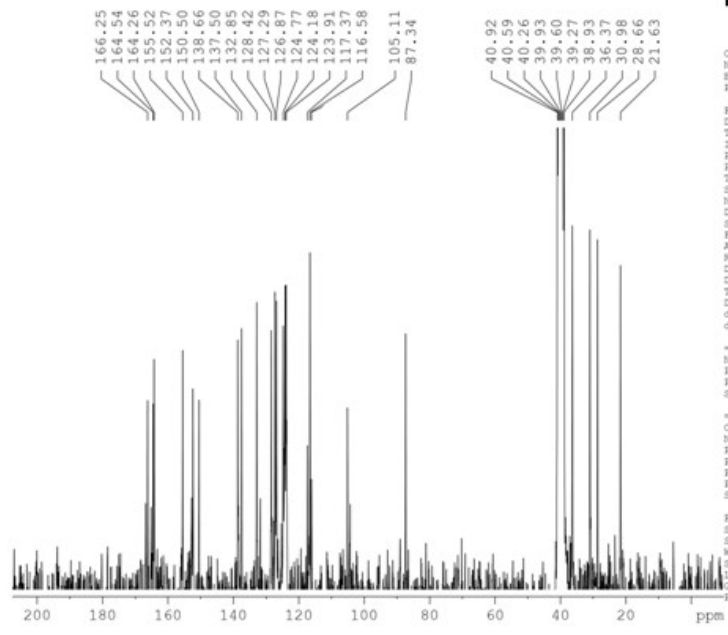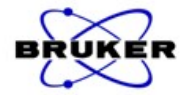

```

Current Data Parameters
NAME          kashan
EXPNO         8
PROCNO        1

F2 - Acquisition Parameters
Date_         20180308
Time          7.51
INSTRUM       spect
PROBHD        5 mm Multinucl
PULPROG       zgpg30
TD            65536
SOLVENT       DMSO
NS            787
DS            0
SWH           15060.241 Hz
FIDRES        0.229801 Hz
AQ            2.1758451 sec
RG            1625.5
DM            33.200 usec
DE            6.00 usec
TE            300.0 K
D1            2.00000000 sec
d11           0.03000000 sec
d12           0.00002000 sec

===== CHANNEL f1 =====
NUC1          13C
P1            10.00 usec
PL1           0.00 dB
SFO1          62.9015280 MHz

===== CHANNEL f2 =====
PCPD2         waltz16
NUC2          1H
PCPD2         80.00 usec
PL2           3.00 dB
PL12          21.50 dB
PL13          23.00 dB
SFO2          250.1310005 MHz

F2 - Processing parameters
SI            32768
SF            62.8952390 MHz
WDW           EM
SSB           0
LB            5.00 Hz
GB            0
PC            1.40
    
```

FT-IR: 6-Amino-5-((4-hydroxy-2-oxo-2H-chromen-3-yl) (4-bromophenyl) methyl)-1,3-dimethylpyrimidine-2,4(1H,3H)-dione (4k):

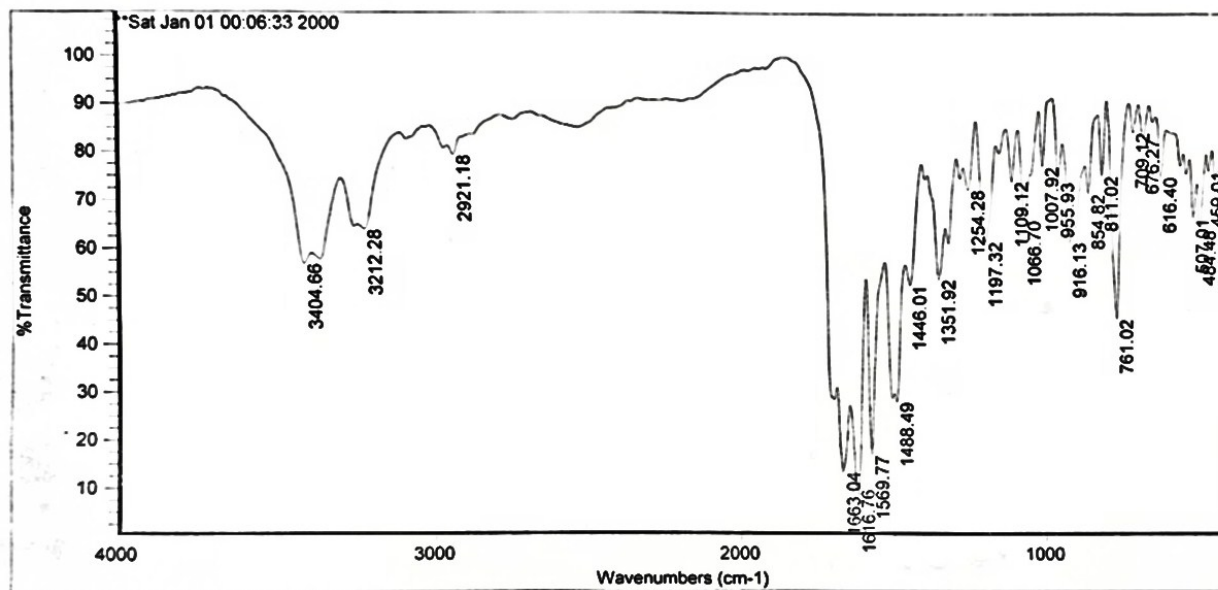

**<sup>1</sup>H NMR: 6-Amino-5-((4-hydroxy-2-oxo-2H-chromen-3-yl) (4-bromophenyl) methyl)-1,3-dimethylpyrimidine-2,4(1H,3H)-dione (4k):**

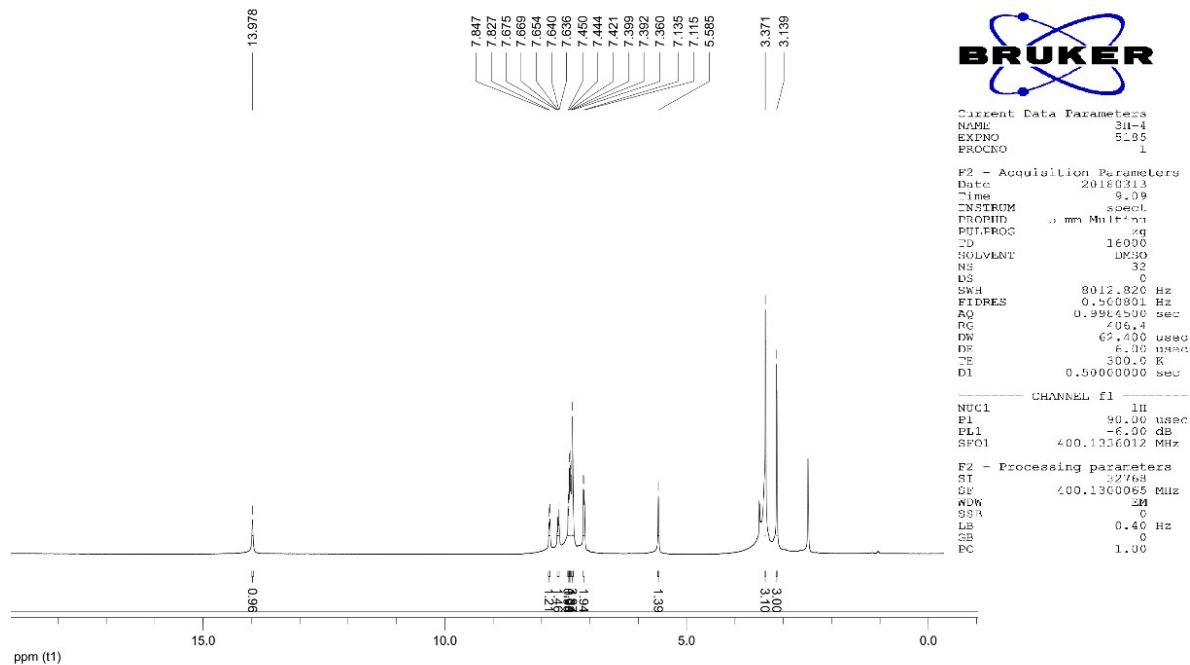

**FT-IR: 6-Amino-5-((4-hydroxy-2-oxo-2H-chromen-3-yl) (4-isopropylphenyl) methyl)-1,3-dimethylpyrimidine-2,4(1H,3H)-dione (4l):**

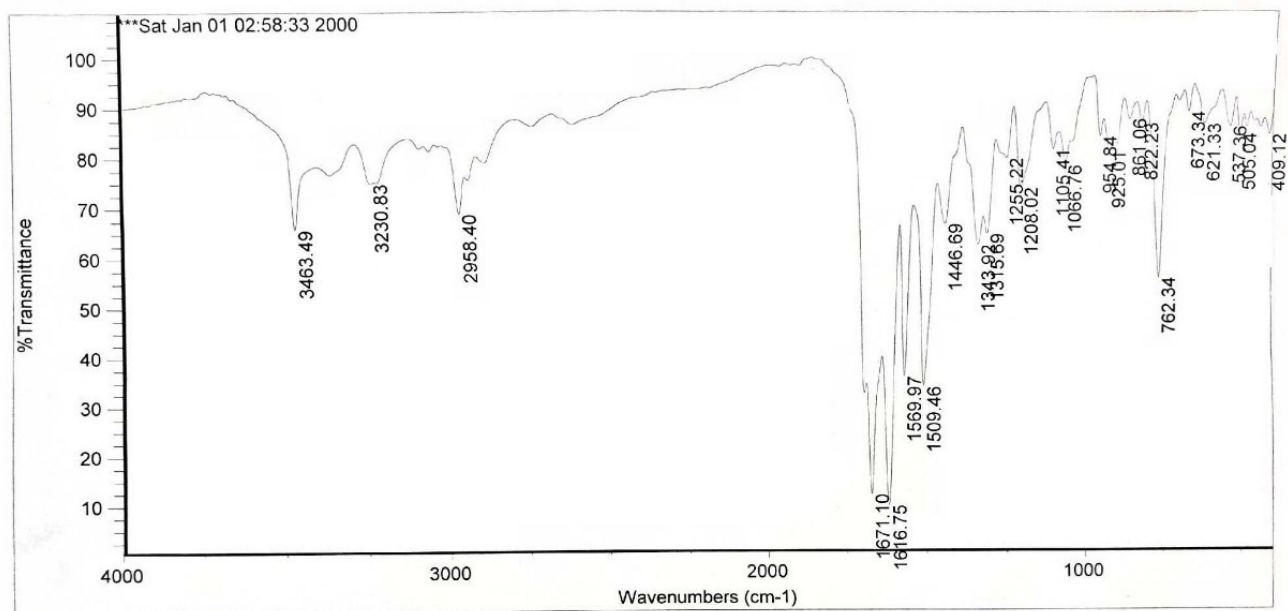

**<sup>1</sup>H NMR: 6-Amino-5-((4-hydroxy-2-oxo-2H-chromen-3-yl) (4-isopropylphenyl) methyl)-1,3-dimethylpyrimidine-2,4(1H,3H)-dione (4l):**

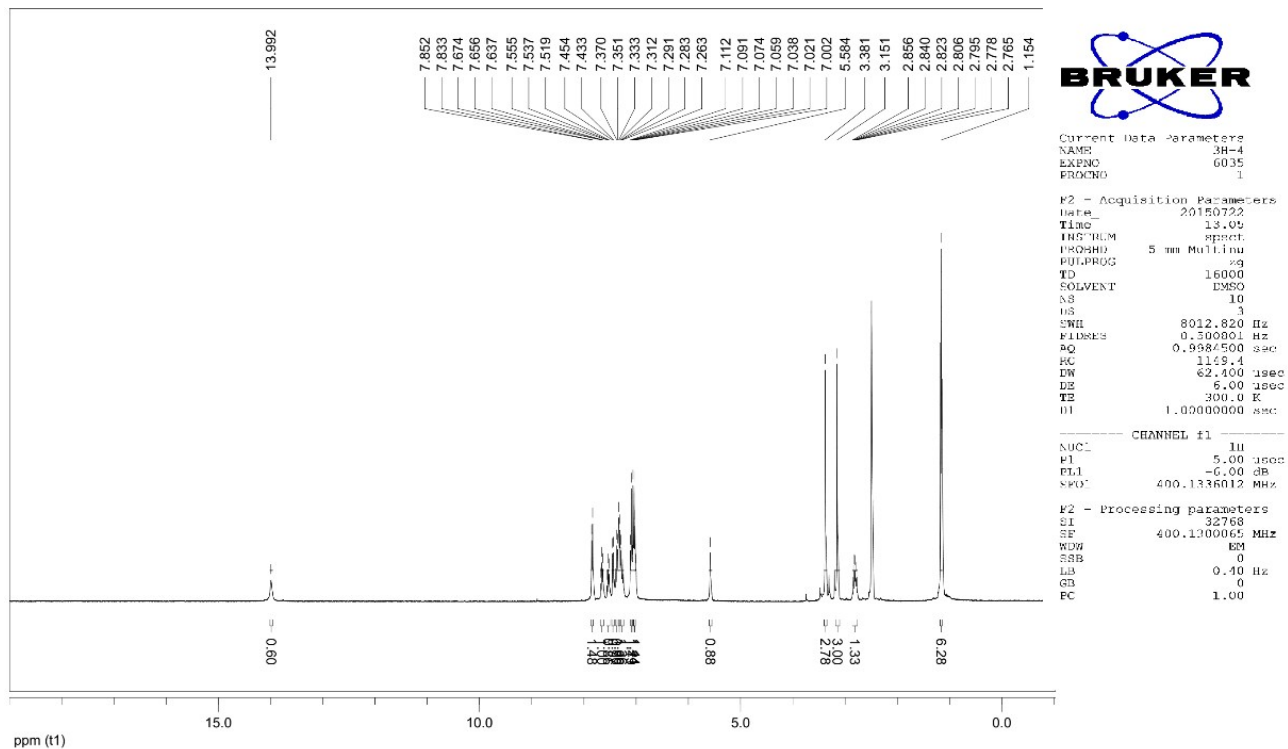

Supplement: c9ra05896f1.pdf [file c9ra05896f1.pdf]
